# Supplementary material
Source: PubMed Central journal article supplement (PMC5937052)
Supplement: mmc1.pdf [file mmc1.pdf]

**Biophysical Journal, Volume 114**

**Supplemental Information**

**Lipid Configurations from Molecular Dynamics Simulations**

**Weria Pezeshkian, Himanshu Khandelia, and Derek Marsh**

Supporting Material

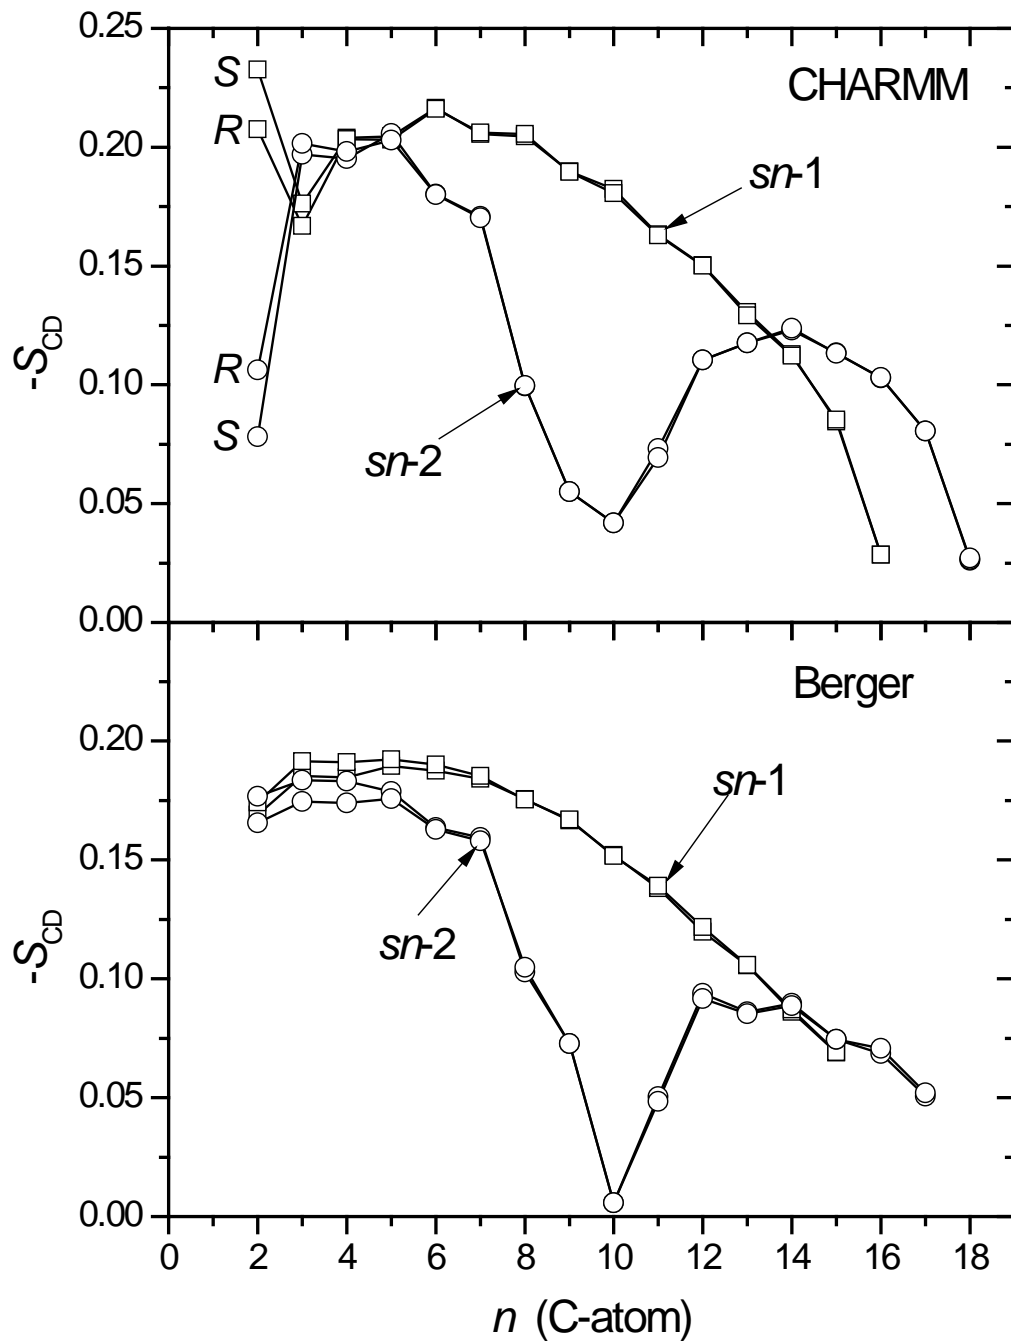

Fig. S.1 C-D order parameters of the  $sn-1$  (squares) and  $sn-2$  (circles) chains of POPC. MD simulations using the CHARMM36 (top panel) and Berger et al. (bottom panel) force fields. Prochirality (R,S) of the H-atoms on C2 is indicated.

**Table S.1** Comparison of partial atomic charges for united atoms of the Berger et al. force field.

| atom        | CHARMM <sup>a</sup> | Berger et al. <sup>b</sup> | atom | CHARMM <sup>a</sup> | Berger et al. <sup>b</sup> |
|-------------|---------------------|----------------------------|------|---------------------|----------------------------|
| N           | -0.60               | -0.50                      | C2   | 0.26                | 0.30                       |
| C33,C34,C35 | 0.40                | 0.40                       | O21  | -0.49               | -0.70                      |
| C32         | 0.40                | 0.30                       | C21  | 0.90                | 0.70                       |
| C31         | 0.10                | 0.40                       | O22  | -0.63               | -0.70                      |
| P           | 1.50                | 1.70                       | C22  | -0.04               | 0.00                       |
| O33,O34     | -0.78               | -0.80                      | C3   | 0.26                | 0.50                       |
| O32         | -0.57               | -0.80                      | O31  | -0.49               | -0.70                      |
| O31         | -0.57               | -0.70                      | C31  | 0.90                | 0.80                       |
| C3          | 0.10                | 0.40                       | O32  | -0.63               | -0.60                      |
|             |                     |                            | C32  | -0.04               | 0.00                       |

<sup>a</sup> Net atomic charge in CHARMM36 (21) corresponding to the united atoms used for the force field of Berger et al. (20).

<sup>b</sup> Taken from quantum chemical calculations of Chiu et al. (24).
